Knop et al.

1 **Maternal care of heterozygous Dopamine Receptor D4**  
2 **knockout mice: Differential susceptibility to early-life**  
3 **rearing conditions.**

4 Jelle Knop<sup>1,2</sup>, Marinus H. van IJzendoorn<sup>3,4</sup>, Marian J. Bakermans-Kranenburg<sup>5</sup>, Marian  
5 Joëls<sup>1,6</sup>, Rixt van der Veen<sup>1,2\*</sup>

6 <sup>1</sup>Dept. Translational Neuroscience, Brain Center Rudolf Magnus, University Medical Center Utrecht,  
7 Utrecht University, Utrecht, The Netherlands

8 <sup>2</sup>Faculty of Social and Behavioural Sciences, Leiden University, Leiden, The Netherlands

9 <sup>3</sup>Dept. of Psychology, Education and Child Studies, Erasmus University Rotterdam, Rotterdam, The  
10 Netherlands

11 <sup>4</sup>Primary Care Unit, School of Clinical Medicine, University of Cambridge, Cambridge, United Kingdom

12 <sup>5</sup>Clinical Child & Family Studies, Vrije Universiteit Amsterdam, Amsterdam, Netherlands

13 <sup>6</sup>University of Groningen, University Medical Center Groningen, Groningen, The Netherlands

14 \*corresponding author: [r.van.der.veen@fsw.leidenuniv.nl](mailto:r.van.der.veen@fsw.leidenuniv.nl)

Knop et al.

15 **Abstract**

16 The differential susceptibility hypothesis proposes that individuals who are more susceptible to  
17 the negative effects of adverse rearing conditions may also benefit more from enriched  
18 environments. Evidence derived from human experiments suggests the lower efficacy dopamine  
19 receptor D4 (*DRD4*) 7-repeat as a main factor in exhibiting these for better and for worse  
20 characteristics. However, human studies lack the genetic and environmental control offered by  
21 animal experiments, complicating assessment of causal relations. To study differential susceptibility  
22 in an animal model, we exposed *Drd4*<sup>+/-</sup> mice and control litter mates to a limited nesting/bedding  
23 (LN), standard nesting (SN) or communal nesting (CN) rearing environment from postnatal day (P) 2-  
24 14. Puberty onset was examined from P24-P36 and adult females were assessed on maternal care  
25 towards their own offspring. In both males and females, LN reared mice showed a delay in puberty  
26 onset that was partly mediated by a reduction in body weight at weaning, irrespective of *Drd4*  
27 genotype. During adulthood, LN reared females exhibited characteristics of poor maternal care,  
28 whereas dams reared in CN environments showed lower rates of unpredictability towards their own  
29 offspring. Differential susceptibility was observed only for licking/grooming levels of female offspring  
30 towards their litter; LN reared *Drd4*<sup>+/-</sup> mice exhibited the lowest and CN reared *Drd4*<sup>+/-</sup> mice the  
31 highest levels of licking/grooming. These results indicate that both genetic and early-environmental  
32 factors play an important role in shaping maternal care of the offspring for better and for worse.

Knop et al.

## 33        **Introduction**

### 34        *1.1. Differential susceptibility*

35        Parental care is essential for survival and development of newborn mammals, including humans.  
36        Variations in parental care substantially contribute to the environmental variability experienced by  
37        offspring. Extensive evidence indicates that poor parental care can contribute to increased  
38        vulnerability to develop later-life psychopathology in humans and impaired cognitive performance in  
39        rodents (Gunnar et al., 2015; Krugers and Joëls, 2014). This vulnerability crucially depends on a  
40        complex cross-talk between an individual's genetic makeup and rearing environment (Nugent et al.,  
41        2011). While the genetic background of some individuals is related to a vulnerable phenotype in the  
42        face of early-life adversity, others appear to be more resilient. Interestingly, individuals who are  
43        genetically more susceptible to the detrimental consequences of negative (rearing) conditions may  
44        also experience greater benefits from a positive and stimulating (rearing) environment (Belsky and  
45        Van IJzendoorn, 2017; Ellis et al., 2011). This crossover effect *for better and for worse*, also called  
46        differential susceptibility, is supported by studies investigating the role of human allelic variation  
47        across a variety of susceptibility genes (Bakermans-Kranenburg and Van IJzendoorn, 2015).

48        An example of such differentially susceptibility concerns the exon III 7-repeat polymorphism of  
49        the D2-like dopamine receptor D4 gene (*DRD4-7R*). In humans, this variant has been associated with  
50        reduced gene expression and efficiency (Asghari et al., 1995; Schoots and Van Tol, 2003) and acts as  
51        a susceptibility marker of dopamine-related genes (Bakermans-Kranenburg and Van IJzendoorn,  
52        2015). Carriers of this variant have an increased risk of developing externalizing problems in relation  
53        to parental insensitivity (Bakermans-Kranenburg and van IJzendoorn, 2006) and chronic stress  
54        (Zandstra et al., 2018). However, these individuals also benefitted most from enhanced positive  
55        parenting (Bakermans-Kranenburg et al., 2008b). Meta-analytic evidence further supports an  
56        important role of dopamine-related genes in moderating susceptibility to both positive and negative

Knop et al.

57 rearing environments (Bakermans-Kranenburg and van IJzendoorn, 2011). Of note, the DRD4 also  
58 plays a role in moderating parental care itself (Leerkes et al., 2017; van IJzendoorn et al., 2008).

### 59 1.2 *Rodent models of impoverished or enriched rearing environments*

60 Studying differential susceptibility in humans is hampered by random genetic variability.  
61 Moreover, it is often difficult to randomly allocate individuals to specific environments while also  
62 taking genotype into account. Therefore, we set out to study the causal contribution of decreased  
63 *Drd4* functioning to differential susceptibility with a truly randomized experiment in rodents,  
64 allowing strict control for both genetic variation and environmental factors (Knop et al., 2017). By  
65 using *Drd4*<sup>+/-</sup> mice, we aimed to mimic the reduced *DRD4* efficiency observed in human *DRD4-7R*  
66 allele carriers.

67 We selected two rodent models developed to chronically induce alterations in the quality  
68 and quantity of parental care received by offspring. First, limited availability of nesting and bedding  
69 (LN) material to a mouse dam was used to induce an adverse early life environment; this model  
70 increases unpredictability of maternal care received by the pups (Davis et al., 2017; Knop et al., 2019;  
71 Molet et al., 2016), leading to increased corticosterone levels in pups (Rice et al., 2008) and altered  
72 offspring development and behavior in adulthood (Bonapersona et al., 2019; Walker et al., 2017).  
73 Second, as beneficial and stimulating social rearing environment we selected a communal nesting  
74 (CN) condition, where two or more dams share care-giving behavior towards multiple litters (Branchi  
75 et al., 2006). In this condition, pups experience higher levels of nest occupancy by at least one dam  
76 (Branchi et al., 2013; Knop et al., 2019) and can interact with peers as well as siblings. Mice reared in  
77 communal nesting conditions exhibit various neurobiological and behavioral characteristics that are  
78 indicative of improved social competences (Branchi and Cirulli, 2014).

### 79 1.3 *Outcome parameters*

Knop et al.

80 In line with a previous study (Knop et al., 2019), we focused on timing of puberty onset, a key  
81 moment in development that is malleable by environmental influences as part of an adaptive  
82 reproductive strategy (Belsky et al., 1991). Although adverse rearing conditions in females are linked  
83 to accelerated pubertal onset in humans (Belsky et al., 2015) and rats (Cowan and Richardson, 2018),  
84 such effects have not yet been observed in mice (Knop et al., 2019). In human males, adverse rearing  
85 conditions had no effect on puberty onset (Grassi-Oliveira et al., 2016), while puberty onset in male  
86 rodents was either unaffected or delayed (Biagini and Pich, 2002; Cowan and Richardson, 2018; Knop  
87 et al., 2019). However, rodent models of early-life adversity (ELA) invariably decrease body weight  
88 gain, which is an important mediator of puberty onset. Therefore, it is unclear whether the delayed  
89 puberty onset observed in ELA reared animals is the result of decreased body weight gain or whether  
90 a *relative* acceleration irrespective of body weight exists in rodents as well.

91 A second outcome was maternal care provided by female offspring. Preclinical studies allow for  
92 feasible, controlled intergenerational studies on maternal care and extensive evidence suggests that  
93 alterations in maternal care may be transmitted across generations (Meaney, 2001). Variations in  
94 levels of licking/grooming (LG) behavior and arched-back nursing (ABN), core features of positive  
95 parenting in rodents, have been shown to affect corticosterone reactivity, hippocampal development  
96 and maternal care of the offspring (Meaney, 2001). In addition, the limited bedding/nesting model,  
97 which evokes changes in maternal care, results in aberrant patterns of maternal care of the offspring  
98 (Roth et al., 2009), whereas mice reared in a communal nesting condition display improved maternal  
99 behavior towards their own pups (Curley et al., 2009). Taken together, these studies highlight the  
100 importance of maternal care for offspring development, as well as the potential of maternal care to  
101 be shaped by the early-life environment, contributing to the intergenerational transmission of social  
102 behavior.

103 In this study, we tested heterozygous *Drd4* knock-out (*Drd4*<sup>+/-</sup>) mice and control litter mates on  
104 susceptibility to both adverse (LN) and enriched (CN) rearing environments to model differential

Knop et al.

105 susceptibility in mice. Animals were examined on i) puberty onset, to track early development, ii)  
106 maternal care, as an indicator of transgenerational effects and iii) basal corticosterone levels, to  
107 investigate involvement of the hypothalamic-pituitary-adrenal-axis (HPA-axis) in differential  
108 susceptibility. Although puberty onset would be hypothesized to be accelerated in LN and delayed in  
109 CN reared animals according to life history theory, previous findings indicate that the opposite may  
110 be true in mice due to the strong effects of body weight. LN reared mice were hypothesized to  
111 display poor maternal care, whereas CN reared mice were hypothesized to show enhanced maternal  
112 care. To confirm differential susceptibility, these effects would have to be amplified in, or exclusive  
113 to, *Drd4*<sup>+/-</sup> mice.

## 114 1. Materials & Methods

### 115 2.1 Animals & Housing

116 B6.129P2-*Drd4*<sup>tm1Dkg/J</sup> (*Drd4*<sup>+/-</sup>) mice (Rubinstein et al., 1997) were originally obtained from  
117 the Jackson Laboratory (Bar Harbor, Maine, USA) and bred in-house with C57BL/6J01aHsd (breeding  
118 colony, originally obtained from Harlan, France) mice for at least 4 generations before experiments  
119 started. All breeding was performed in our own animal facility. Wild-type (wt) female C57BL/6 mice  
120 were allowed to breed with male *Drd4*<sup>+/-</sup> mice to generate *Drd4*<sup>+/-</sup> F1 offspring and *Drd4*<sup>+/+</sup> control  
121 litter mates. *Drd4*<sup>+/-</sup> mice are viable, healthy and visually indistinguishable from control animals.  
122 Between postnatal day 2 and 14 (P2-14), dam and litter were exposed to a limited nesting/bedding  
123 (LN), standard (SN) or communal nesting (CN) condition. A total of 129 female and 116 male F1  
124 offspring obtained from 40 breedings was used to assess puberty onset and, in females (n = 75),  
125 maternal care of this generation (see Fig 1. for a timeline of the experiment). Puberty onset and F1  
126 maternal care were scored by a trained experimenter blind to rearing condition and genotype of the  
127 animals. Mice had *ad libitum* access to water and chow and were housed on a reversed LD cycle  
128 (lights off 08:00 h, temperature 21-22 °C, humidity 40-60 %). All experiments were performed in

Knop et al.

129 accordance with the EC council directive (86/609/EEC) and approved by the Central Authority for  
130 Scientific Procedures on Animals in the Netherlands (CCD approval AVD115002016644).

## 131 2.2 *Breeding conditions*

132 Breeding was performed as described earlier (Knop et al., 2019). In short, one male was  
133 paired with two females for 4 days, after which females were co-housed until approximately one  
134 week prior to birth. Pregnant dams were then housed in a type II short Macrolon cage (21.5 x 16 cm)  
135 with filter top and a Nestlet (5 x 5 cm, Technilab-BMI, Someren, The Netherlands) as nesting  
136 material. Daily inspection for the birth of litters was conducted at 09:00 h, assigning the day prior as  
137 P0. At P2, dam and litters were weighed and randomly assigned to the LN, SN or CN condition. All  
138 litters were culled (or cross-fostered if necessary) to 6-7 pups per litter, with a maximum addition of  
139 1 pup per litter and a minimum of 2 pups of each sex in each litter.

140 The LN condition consisted of placing the dam and litter in a cage with limited bedding  
141 material, covered by a stainless steel wired mesh. In addition only half the regular amount of nesting  
142 material was available. In the SN condition, standard amounts of bedding and nesting material were  
143 available to the dam. The CN paradigm consisted of co-housing the experimental wt dam (and her  
144 genetically heterogeneous F1 litter) with another wt ear-punched dam (and wt litter) in a type II  
145 regular Macrolon cage (32x16 cm). The pups of this second mother were marked with surgical  
146 marker at P2 and P7 (ArcRoyal, Ireland) to ensure correct allocation of the pups to their mother at  
147 the end of communal housing at P14. At P9 and P14, all dams and litters were weighed and provided  
148 with clean cages, adding a bit of used bedding material to maintain odor cues. From P14 until  
149 weaning at P21, animals were housed in standard nesting conditions. All mice were weighed at  
150 weaning and ear punches were obtained to facilitate individual recognition and genotype offspring.

## 151 2.3 *Maternal care observations F0*

Knop et al.

152 An instantaneous sampling method (Knop et al., 2019) was used to score maternal behavior  
153 of the dams in different conditions. Three 75-minute scoring sessions were performed daily from P2-  
154 9 between 06:00-07:30 am (end light phase), 12:00-14:00 pm (mid dark phase) and 16:30-18:30 pm  
155 (end dark phase). Red light conditions were used to score during the dark phase sessions. Maternal  
156 behavior of each dam was scored every three minutes, leading to 25 observations per session and 75  
157 observations per day for each dam. Maternal behaviors were classified as: arched-back nursing  
158 (ABN), passive nursing, licking/grooming pups (LG), nest building, self-grooming on nest, feeding and  
159 self-grooming off nest. For observations during which the behavior did not qualify for one of these  
160 categories, only on or off nest location of the dam was scored. A Samsung Galaxy Note 4 with Pocket  
161 Observer 3.3 software (Noldus, the Netherlands) was used for behavioral scoring, and data was  
162 analyzed using Observer XT 10.5 (Noldus, the Netherlands). Both dams in the communal nesting  
163 condition were scored separately, using average scores of each pair of dams as an indication of  
164 maternal behavior received by the litter.

165 Assessment of maternal care was performed by looking at i) frequencies of the various  
166 maternal behaviors, ii) unpredictability of maternal care and iii) fragmentation, using on/off nest  
167 transitions. First, percentage of time spent on the various maternal behaviors was calculated per day  
168 (pooling the 3 daily sessions) or circadian phase (pooling over 6 postnatal days) to assess the  
169 development over days and circadian rhythmicity of maternal care, respectively. Second, overall  
170 unpredictability of maternal behavior was evaluated using the entropy rate of transitions between  
171 different maternal behaviors (Molet et al., 2016). The entropy rate is obtained by calculating the  
172 probabilities of certain maternal behaviors predicting specific subsequent behaviors, in which higher  
173 entropy rates are indicative of higher unpredictability. In addition, unpredictability of maternal care  
174 specifically on the nest site was calculated by pooling all off-nest behaviors to enhance  
175 representation of the unpredictability rate as experienced by the offspring. Third, the average  
176 number of transitions from and to the nest site per observation was used as an index of  
177 fragmentation of maternal care (Rice et al., 2008).



Knop et al.

178 2.4 *Puberty onset F1*

179 As an external measure of puberty onset in males, mice were restrained and gently examined  
180 daily from P27-P33 on the potential to fully retract the glans penis and expose the glans penis which  
181 was designated as puberty onset (Korenbroet et al., 1977). Female mice were scored daily from P24-  
182 P36 for vaginal opening, here taken as sign of puberty onset (Caligioni, 2010). All mice were weighed  
183 at puberty onset.

184 2.5 *Maternal care F1*

185 During adulthood (>P70), female F1 mice were allowed to breed with a wild-type male as  
186 described for F0. All F2 litters were culled/cross-fostered to 6 pups and reared in standard nesting  
187 conditions. At P2, P9, P14 and P21, clean cages were provided and animals were weighed. Maternal  
188 care observations were performed as described for F0 maternal behavior. At P7 between 10:00-  
189 12:00 am, pup retrieval behavior was measured using a 5 minute pup retrieval test as described  
190 earlier (Knop et al., 2019). If a dam did not retrieve all three pups within 5 minutes, a latency of 300  
191 seconds was assigned.

192 2.6 *Plasma corticosterone levels F1*

193 To measure plasma corticosterone levels, all F1 dams were decapitated in random order  
194 between 13:00 – 17:00 at least 3 weeks after weaning of F2 litters. Trunk blood was collected in  
195 heparin containing tubes (Sarstedt, The Netherlands) on ice and centrifuged for 10 minutes (13000  
196 rpm) at 4 °C. Plasma was collected and stored at -20 °C until radioimmunoassay (MP Biomedicals, The  
197 Netherlands; sensitivity 3 ng/ml).

198 2.6 *Statistical analysis*

199 Data are expressed as mean  $\pm$  SEM. Values deviating >3.29 SD from the mean were defined  
200 as outlying and winsorized accordingly (Tabachnick and Fidell, 2007). The entropy rate of one F0 LN

Knop et al.

201 dam was winsorized. Data was analyzed using SPSS 23 (IBM) and litter effects in F1 were accounted  
202 for using the SPSS complex samples module. However, no effect sizes are provided in this model. In  
203 other analyses, eta squared effect sizes ( $\eta^2$ ), representing the explained variance relative to the total  
204 model variance, are reported. Overall ANOVA statistics are presented in the text, Tukey HSD (main  
205 effects) or Sidak (interactions) corrected post-hoc comparisons are depicted in figures.

206 Greenhouse-Geisser corrected repeated measures ANOVAs with breeding condition as the  
207 between-subject factor and postnatal day or observation as within-subject factors were used to  
208 analyze F0 maternal behaviors. Maternal behaviors from two observation sessions at P2 were  
209 analyzed separately to dissociate acute effects of novel environment exposure from more chronic  
210 alterations in maternal care. P2 maternal behavior, entropy rates and fragmentation were analyzed  
211 using a one-way ANOVA with breeding condition as the between-subjects factor. Pup retrieval  
212 latencies of F1 dams were analyzed using cox regression, as this method is preferred if a subset of  
213 animals fails to complete a certain task (Jahn-Eimermacher et al., 2011). All other F1 measures were  
214 analyzed using a two-way ANOVA including rearing condition and genotype as independent variables.  
215 Pearson correlations were used for correlational data. Mediation analysis was conducted using the  
216 PROCESS v3 SPSS macro (Hayes and Preacher, 2014), with rearing condition as a multicategorical  
217 independent variable and the SN group as the reference category. The day of puberty onset was used  
218 as dependent variable and body weight at weaning and received entropy rates as potential  
219 mediators. Significant mediation was assigned when 95% confidence intervals of mediation did not  
220 include zero.

Knop et al.

## 221 2. Results

### 222 3.1 Maternal care FO

223 The maternal care of mouse dams was affected by environmental condition (Fig. 2). Nesting  
224 condition altered arched-back nursing levels ( $F(2, 36) = 5.69, p = .007, \eta^2 = 0.24$ , Fig. 2a), with  
225 increased ABN levels in LN dams compared to individual CN dams. Moreover, nesting condition  
226 altered passive nursing levels ( $F(2, 36) = 5.10, p = .011, \eta^2 = 0.22$ , Fig. 2b). Post-hoc analysis revealed  
227 that CN dams spent less time passively nursing their pups compared to SN dams. Together, nesting  
228 conditions affected the total nursing levels (i.e., the sum of ABN and passive nursing) displayed by  
229 individual dams ( $F(2, 36) = 14.27, p < .001, \eta^2 = 0.44$ , Fig. 2c). Individual dams in the communal  
230 nesting condition exhibited decreased nursing levels compared to both SN and LN dams. In addition,  
231 feeding behavior of dams was affected by condition ( $F(2, 36) = 12.36, p < .001, \eta^2 = 0.41$ , Fig. S1a),  
232 with an increase in CN dams compared to both SN and LN animals.

233 Although condition did not affect licking/grooming behavior from P3-8 ( $F(2, 36) = 0.13, p =$   
234  $.880, \eta^2 = 0.01$ , Fig. 2d), LG levels were affected more acutely at P2 ( $F(2, 36) = 4.32, p = .021, \eta^2 =$   
235  $0.19$ ). Post-hoc testing indicated that specifically pups in a LN setting were deprived from LG on this  
236 first day of novel environment exposure. The time spent on the nest site differed across conditions  
237 ( $F(2, 36) = 25.95, p < .001, \eta^2 = 0.59$ , Fig 2e); LN dams spent more time on the nest compared to SN  
238 and CN dams. This was mostly due to an increase in the time LN dams were engaging in non pup  
239 directed behaviors on the nest site (self-grooming and other behavior, see Fig S1). Nest occupancy of  
240 individual CN dams was decreased compared to both LN and SN dams. Nevertheless, the nest site in  
241 the CN setting had higher levels of nest occupancy by at least one dam compared to the SN condition  
242 ( $F(1, 25) = 76.00, p < .001, \eta^2 = 0.75$ , Fig. 2f). Moreover, circadian rhythmicity of nest occupancy was  
243 altered by exposure to different conditions (observation\*condition interaction:  $F(3.51, 64.86) = 2.72,$   
244  $p = .044, \eta^2 = 0.06$ , Fig. 2e, right panel) . In particular dams in the LN condition exhibited higher levels  
245 towards the end of the dark phase compared to dams in the CN and SN condition. The same pattern

Knop et al.

246 was observed in arched-back nursing (observation\*condition interaction:  $F(3.69, 68.31) = 3.40$ ,  $p =$   
247  $.016$ ,  $\eta^2 = 0.07$ , Fig. 2e, right panel)

248 The overall unpredictability of behavior displayed by the dams was not significantly affected  
249 by condition ( $F(2, 37) = 2.70$ ,  $p = .081$ ,  $\eta^2 = 0.13$ , Fig. 2g). However, the unpredictability of behavior  
250 on the nest site (on nest entropy rates) differed ( $F(2, 37) = 16.02$ ,  $p < .001$ ,  $\eta^2 = 0.46$ , Fig. 2h). Post-  
251 hoc comparisons revealed that the LN dams displayed increased unpredictability of maternal care  
252 compared to the SN and CN dams. Nesting condition also affected fragmentation of maternal care,  
253 measured by the number of transitions from and to the nest site ( $F(2, 37) = 13.08$ ,  $p < .001$ ,  $\eta^2 = 0.41$ ,  
254 Fig. 2i); individual CN dams exhibited increased fragmentation compared to SN and LN dams.

### 255 3.2 *Body weight F1*

256 While body weight of litters before exposure to different rearing condition was comparable  
257 across groups, condition affected litter weight after condition at P14 ( $F(2, 37) = 32.44$ ,  $p < .001$ ,  $\eta^2 =$   
258  $0.64$ , Fig. 2j). LN reared litters weighed less than both SN and CN litters. At weaning, LN reared mice  
259 remained lighter than SN and CN animals, which was found in both males ( $F(2, 36) = 8.77$ ,  $p = .003$ ,  
260 Fig. 2k) and females ( $F(2, 37) = 20.60$ ,  $p < .001$ , Fig. 2l). In females, heterozygous knock-out of the  
261 dopamine receptor D4 did not affect body weight ( $F(1, 38) = 0.45$ ,  $p = .505$ ). In contrast, a reduction  
262 of body weight was observed in *Drd4*<sup>+/-</sup> males ( $F(1, 38) = 4.97$ ,  $p = .032$ ). However, *Drd4* genotype did  
263 not interact with rearing condition in either males ( $F(2, 36) = 0.39$ ,  $p = .686$ ) or females ( $F(2, 37) =$   
264  $0.15$ ,  $p = .829$ ).

### 265 3.3 *Puberty onset*

266 *Males.* In males, rearing condition affected timing of puberty onset, measured by preputial  
267 separation ( $F(2, 36) = 10.33$ ,  $p = .001$ , Fig. 3a). LN reared mice had a delayed puberty onset compared  
268 to SN and CN reared mice, but rearing conditions did not interact with *Drd4* genotype ( $F(2, 36) =$   
269  $1.84$ ,  $p = .121$ ). No main effect of *Drd4* genotype on puberty onset was observed ( $F(1, 37) = 2.83$ ,  $p =$

Knop et al.

270 0.101). Body weight at the day of puberty onset (Fig. 3b) was unaltered by condition ( $F(2, 34) = 2.20$ ,  
271  $p = .382$ ) or genotype ( $F(1, 35) = 0.38$ ,  $p = .544$ ). Puberty onset negatively correlated with body  
272 weight at weaning ( $r = -0.61$ ,  $p < .001$ , Fig. 3c). In males no correlation between received entropy  
273 rates during development and puberty onset was found ( $r = 0.10$ ,  $p = .278$ , Fig. 3d). Mediation  
274 analysis revealed that in males, the delayed puberty onset found in LN reared mice was partly  
275 mediated by the reduced body weight at weaning (95%CI = [0.36, 1.17], Fig. 3e).

276 *Females.* A similar effect of condition was observed for puberty onset in females ( $F(2, 38) =$   
277  $13.09$ ,  $p = .003$ , Fig. 3f), where vaginal opening of LN reared mice occurred at a later stage than in SN  
278 or CN reared animals, irrespective of genotype ( $F(2, 38) = 0.28$ ,  $p = .947$ ). In contrast to males, female  
279 body weight at puberty onset was affected by rearing condition ( $F(2, 38) = 4.29$ ,  $p = .010$ , Fig. 3g).  
280 Post-hoc testing revealed that CN reared females had increased body weight at the time of puberty  
281 onset. As in males, neither puberty onset ( $F(1, 39) = 0.52$ ,  $p = .477$ ) nor bodyweight at puberty onset  
282 ( $F(1, 39) = 0.09$ ,  $p = .767$ ) was affected by *Drd4* genotype. Similar to males, a negative correlation  
283 between body weight at weaning and puberty onset was observed ( $r = -0.46$ ,  $p < .001$ , Fig. 3h).  
284 Mediation analysis revealed that body weight at weaning was a significant mediator of puberty onset  
285 for both LN (95%CI = [0.36, 1.66], Fig. 3j) and CN reared animals (95%CI = [-0.96, -0.08]). Although  
286 received entropy levels positively correlated with puberty onset in females ( $r = 0.31$ ,  $p < .001$ , Fig. 3i),  
287 it did not mediate the effects of rearing condition on puberty onset (LN: 95%CI = [-1.21, 0.83]; CN:  
288 95%CI = [-0.29, 0.23]).

### 289 3.4 Maternal care F1

290 No main effect of *Drd4* genotype was observed for any of home-cage maternal behaviors.  
291 However, mice that were exposed to different rearing conditions during early development displayed  
292 altered levels of arched-back nursing (ABN) towards their own offspring ( $F(2, 33) = 4.02$ ,  $p = .027$ , Fig.  
293 4a). LN reared dams performed less ABN than SN reared animals, irrespective of genotype  
294 (condition\*genotype interaction: ( $F(2, 33) = 1.32$ ,  $p = .275$ ). Passive nursing levels were not affected

Knop et al.

295 by either condition ( $F(2, 33) = 0.73$ ,  $p = .475$ , Fig. S2a) or the condition\*genotype interaction ( $F(2, 33)$   
296  $= 0.58$ ,  $p = .630$ ). Rearing condition affected total nursing levels ( $F(2, 33) = 4.79$ ,  $p = .024$ , Fig S2b),  
297 with an increase in CN reared mice compared to LN dams. Rearing condition also affected the time  
298 dams spent on the nest site ( $F(2, 33) = 7.40$ ,  $p = .002$ , Fig. 2b), irrespective of genotype ( $F(2, 33) =$   
299  $0.13$ ,  $p = .845$ ). Dams reared in the LN environment spent less time on the nest site compared to SN  
300 and CN reared animals. A main effect of rearing condition was also observed for the percentage of  
301 time dams spent licking/grooming their own pups ( $F(2, 33) = 4.51$ ,  $p = .011$ , Fig. 4c), a key maternal  
302 behavior: LN reared dams spent less time licking/grooming than dams reared in a communal nesting  
303 environment. Moreover, while *Drd4* genotype did not affect LG levels ( $F(1, 34) = 0.10$ ,  $p = .758$ ), an  
304 interaction between genotype and rearing condition was observed ( $F(2, 33) = 4.99$ ,  $p = .028$ ). *Drd4*<sup>+/-</sup>  
305 dams reared in the LN environment exhibited the lowest LG levels, whereas CN reared *Drd4*<sup>+/-</sup> mice  
306 spent the most time licking/grooming their own pups.

307 While F0 dams did not differ in total entropy rate, rearing condition had a significant effect  
308 on the total entropy rate of maternal behavior of F1 dams ( $F(2, 33) = 3.20$ ,  $p = .032$ , Fig. S2c).  
309 Unpredictability was decreased in CN reared mice compared to dams reared in a SN environment. No  
310 genotype ( $F(1, 34) = 0.19$ ,  $p = .733$ ) nor interaction ( $F(2, 33) = 0.72$ ,  $p = .411$ ) effect was observed. In  
311 addition to the effects on total unpredictability, on-nest unpredictability was also affected by  
312 condition ( $F(2, 33) = 3.62$ ,  $p = .044$ ), where CN reared dams displayed lower rates compared to LN  
313 reared animals (Fig. S4d). On-nest unpredictability was unaffected by genotype ( $F(1, 34) = 0.31$ ,  $p =$   
314  $.579$ ) or the condition\*genotype interaction ( $F(2, 33) = 0.85$ ,  $p = .374$ ). Fragmentation of maternal  
315 care was not affected by early life condition ( $F(2, 33) = 1.08$ ,  $p = .269$ , Fig. 4e), genotype ( $F(1, 34) =$   
316  $0.12$ ,  $p = .728$ ), or the interaction ( $F(2, 33) = 0.54$ ,  $p = .505$ ). Thus, while CN animals were raised with  
317 more fragmented maternal care, they did not differ in this behavior themselves when allowed to  
318 breed in a standard nesting condition. Cox regression revealed that pup retrieval was unaffected by  
319 rearing condition (hazard ratio 95%CI = [0.72, 1.39],  $p = 0.986$ ), but *Drd4* genotype affected

Knop et al.

320 completion rate of pup retrieval (hazard ratio 95%CI = [1.03, 2.85],  $p = 0.040$ ). *Drd4*<sup>+/-</sup> dams were  
321 more likely to retrieve all pups within 5 minutes than *Drd4*<sup>+/-</sup> animals (Fig. S2d).

322 Rearing condition of the dam affected body weight of the next generation (F2) at P2 ( $F(2, 33)$   
323 = 4.39,  $p = .012$ , Fig. S2d), which was decreased in offspring from a LN reared mother compared to  
324 offspring from CN reared dams. However, this was normalized at weaning at P21 ( $F(2, 31) = 2.38$ ,  $p =$   
325  $.313$ , Fig. S2e). Genotype of the dam did not affect offspring body weight (P2: ( $F(1, 34) = 0.06$ ,  $p =$   
326  $.816$ ); P21 ( $F(1, 32) = 0.52$ ,  $p = .475$ )), nor did it interact with rearing condition (P2: ( $F(2, 33) = 0.01$ ,  $p$   
327 =  $.988$ ); P21 ( $F(2, 31) = 0.97$ ,  $p = .400$ )).

### 328 3.5 Corticosterone

329 Basal levels of blood plasma corticosterone were not affected by rearing condition ( $F(2, 32) =$   
330  $0.10$ ,  $p = .904$ , Fig. 2f) nor genotype ( $F(1, 33) = 2.04$ ,  $p = .163$ ). Moreover, *Drd4* genotype did not  
331 interact with rearing condition to affect corticosterone levels ( $F(2, 32) = 0.55$ ,  $p = .532$ ).

## 332 3. Discussion

333 In the present study, we examined the causal contribution of *Drd4* in differential susceptibility  
334 with a randomized experiment in rodents, allowing strict control for both genetic variation  
335 functioning –using *Drd4*<sup>+/-</sup> mice- and early-life environmental factors. We demonstrate how different  
336 environmental conditions affect maternal care of mouse dams and subsequent sexual maturation in  
337 offspring. Interestingly, different rearing conditions during early development alter maternal care of  
338 adult mice towards their own offspring. Mice reared in a limited nesting/bedding environment are  
339 poor mothers in terms of arched-back nursing levels and nest presence. In contrast, communal  
340 nesting during early development results in mice that display lower rates of unpredictability in their  
341 own maternal behavior. Differential susceptibility was observed only for licking/grooming levels of  
342 female offspring towards their litter, of which LN and CN reared *Drd4*<sup>+/-</sup> mice exhibited the lowest  
343 and highest levels, respectively.

Knop et al.

344 4.1 *Modelling impoverished and enriched rearing environments*

345 The pattern of F0 maternal care resulting from exposure to the LN condition was largely in line  
346 with earlier findings using this model (Davis et al., 2017; Knop et al., 2019; Molet et al., 2016; Rice et  
347 al., 2008). While different pup-directed maternal behaviors remained relatively unaltered, the  
348 unpredictability of maternal behavior, particularly on the nest site, increased. However, in contrast  
349 to other reports, but in line with previous findings from our own lab (Knop et al., 2019)  
350 fragmentation of maternal care was similar to control conditions. In addition, it is important to note  
351 that pups in the LN condition were deprived from normal levels of licking/grooming upon first  
352 exposure to this condition on P2, whereas LG levels were similar to the SN and CN conditions from  
353 P3-P8. Moreover, a different circadian pattern in nest occupancy indicates that, similar to earlier  
354 results (Knop et al., 2019), LN dams exhibited altered circadian rhythmicity in maternal care, stressing  
355 the point that multiple time-points across the day-night should be examined to better grasp the  
356 implications of the LN condition.

357 Mouse dams adapted their maternal care to the communal nesting condition by decreasing  
358 nursing levels and increasing feeding behavior. However, despite decreased nursing time per dam,  
359 offspring body weight was similar compared to SN reared animals. This could be explained in part by  
360 the observation that pups in the communal nesting condition have increased accessibility to at least  
361 one mouse dam, a hallmark of the early social enrichment provided by this model (Branchi and  
362 Cirulli, 2014). In addition, litters in the CN condition are of a larger litter size, likely requiring less  
363 energy per pup to regulate body temperature.

364 4.2 *Sexual maturation*

365 The delayed puberty onset observed in both male and female LN reared mice was mediated by a  
366 decrease in body weight gain at weaning. The importance of body weight and leptin in regulating  
367 puberty onset is well-known for both humans (Lee et al., 2007; Tomova et al., 2015) and rodents  
368 (Ahima et al., 1997). We therefore also measured body weight at puberty onset for the adolescent



Knop et al.

369 mice that were raised in different early life conditions. The minimal differences in body weight at  
370 puberty onset suggest that, irrespective of early life background and subsequent body weight at  
371 weaning, the majority of mice postpone the onset of puberty until a certain body weight is reached.  
372 Only female mice reared in a CN setting showed increased body weight at puberty onset, indicating  
373 that these animals might exhibit, in line with the acceleration hypothesis, a *relative* delay in puberty  
374 onset, irrespective of bodyweight. It should be noted that early-life adversity not only affects body  
375 weight, it also alters adipose tissue, plasma leptin and leptin mRNA levels (Yam et al., 2017).  
376 Therefore, the mediation of puberty onset following LN is more complex and should be studied in  
377 more detail than only examining body weight per se. Nevertheless, the lack of differences in body  
378 weight at puberty onset between LN and SN reared mice, in combination with the delayed puberty  
379 onset of female mice that experienced increased unpredictability during rearing are not in line with  
380 the acceleration hypothesis of life history earlier proposed in humans. This may point to species  
381 differences but could also signify the relevance of uncontrolled factors in humans (e.g. caloric intake)  
382 that are controlled for in the current design.

#### 383 4.3 *Rearing conditions affect later-life maternal care*

384 Different rearing conditions have been shown to affect maternal care provided to the next  
385 generation in the LN (Roth et al., 2009) and CN (Curley et al., 2009) models. Although previous results  
386 from our lab showed no effects of either LN or CN from P2-9 on adult maternal behavior (Knop et al.,  
387 2019), the results presented here do support long-lasting effects of rearing condition on maternal  
388 care. This could be explained by the duration and timing of exposure to early-life rearing conditions  
389 (P2-P9 in previous study compared to P2-14 in the present study). Given the different trajectories in  
390 brain circuit development (Hensch, 2005; Rice et al., 2000), the effects of early-life adversity, and  
391 potentially also enrichment, strongly depend on the critical period during which it occurs (Peña et al.,  
392 2019). The importance of this critical or sensitive period is highlighted by a recent study showing that  
393 different windows of exposure to the LN paradigm alter susceptibility to social defeat stress during

Knop et al.

394 adulthood (Peña et al., 2017). By extending the exposure of pups to different rearing conditions the  
395 development of brain regions involved in the regulation of maternal care, like the MPOA and mPFC  
396 (Dulac et al., 2014), may have been targeted more profoundly.

397 Extensive research from Meaney and co-workers have identified the pivotal role of arched-back  
398 nursing and licking/grooming behavior in rodent development (Caldji et al., 1998; Liu et al., 1997;  
399 Meaney, 2001). Many studies investigating intergenerational transmission of maternal care observe  
400 a similar phenotype in the offspring and the mother (Champagne, 2008; Curley et al., 2008).  
401 Interestingly, the lower ABN and nest occupancy levels of LN reared female mice observed in our  
402 current study did not coincide with a lower ABN or nest presence of their own mother. On the  
403 contrary, female LN reared pups experienced *increased* levels of nest occupancy by the dam  
404 compared to the SN condition, but showed *lower* levels of nest occupancy when taking care of a litter  
405 themselves. Similarly, CN reared mice received comparable levels of unpredictability as standard  
406 reared mice, yet provided more predictable maternal behavior towards their own offspring. Finally,  
407 LN reared animals received increased on-nest unpredictability but showed similar on-nest entropy  
408 rates compared to SN reared dams. Thus, although the differences in maternal care of F1 dams  
409 presented here are not mimicking the phenotype of the mother, the quality of the early-life  
410 environment (poor vs. enriched) did affect the quality of F1 maternal care under standard breeding  
411 conditions.

412 For licking/grooming behavior, the effects of rearing conditions were restricted to *Drd4*<sup>+/-</sup>  
413 animals, whereas rearing conditions had no effect on LG levels in wild-type animals. Using *Drd4*  
414 genotype as a susceptibility factor, this is supportive evidence for differential susceptibility in our  
415 controlled animal model with respect to a key feature of rodent maternal care, across generations.  
416 Studies on differential susceptibility in humans focused predominantly on the effects of maternal  
417 care on child development, highlighting the increased susceptibility of *DRD4-7R* carrying children to

Knop et al.

418 parental sensitivity (Bakermans-Kranenburg et al., 2008a). However, these studies have not yet  
419 examined parental care of the next generation.

420 Clearly, the exact mechanisms through which the early-life environment impacts on later-life  
421 behavior remain to be elucidated. Previous studies suggest an important role for the methylation of  
422 genes involved in the HPA-axis (Turecki and Meaney, 2016). Human studies also link the *DRD4-7R*  
423 genotype to alterations in components of the HPA-axis. Gene-early environment effects have been  
424 observed for basal cortisol in children (Bakermans-Kranenburg et al., 2008a), as well as stress  
425 induced cortisol levels of young adults (Buchmann et al., 2014). A prominent role for alterations in  
426 circulating basal corticosterone levels in adulthood is not supported by our data. However, stress  
427 reactivity was not assessed and could, at least in part, underlie the observed alterations in maternal  
428 care.

429 Other systems may also be critical in the mechanism underlying differential susceptibility. Recent  
430 studies using different molecular tools and mouse knock-in models have begun to unravel the exact  
431 function of the *DRD4-7R* in corticostriatal glutamatergic neurotransmission, enhancing our  
432 understanding of the *DRD4* receptor and susceptibility to the environment (Bonaventura et al., 2017;  
433 González et al., 2012). Other studies used a wide array of novel techniques to show the involvement  
434 of dopamine receptors in mediating the social deficits observed after severe early-life stress (Shin et  
435 al., 2018). These advances in our understanding of the functioning of different dopamine receptors in  
436 regulating susceptibility will help to guide future studies into the role of *DRD4*.

437 There is increasing awareness that most consequences of early-life rodent models have small  
438 effect sizes (Bonapersona et al., 2019), which is also the case in our study. Although we have very  
439 decent group numbers compared to common practice in this field, we should take this into  
440 consideration and interpret the results with care. To increase statistical power in future experiments,  
441 animal numbers should be adapted to realistically expected effect sizes and animal ethical

Knop et al.

442 committees should be aware of this (Button et al., 2013). Moreover, meta-analyses in this field  
443 should be stimulated and can help in designing future studies (Bonapersona et al., 2019).

#### 444 **Conclusion**

445 The research presented here provides a translational approach to examine the contribution  
446 of the *Drd4* gene in differential susceptibility. While other preclinical studies on differential  
447 susceptibility in socially monogamous prairie voles focused on the role of *prenatal* stress in  
448 enhancing developmental plasticity to both adverse and supportive contexts (Hartman et al., 2018;  
449 Hartman and Belsky, 2018), we show that adverse or enriched *postnatal* environments also interact  
450 with *genetic* factors in mice, for better and for worse. Future experiments should be targeted to test  
451 which neurobiological mechanisms are involved in mediating the effects of *DRD4* with regard to  
452 differential susceptibility.

#### 453 **Acknowledgements**

454 This work was supported by the Consortium on Individual Development (CID), which is funded  
455 through the Gravitation program of the Dutch Ministry of Education, Culture, and Science and the  
456 Netherlands Organization for Scientific Research (NWO grant number 024.001.003). M.J. Bakermans-  
457 Kranenburg was supported by the European Research Council (ERC AdG 669249); M.H. van  
458 IJzendoorn was supported by the Netherlands Organization for Scientific Research (Spinoza Prize).

459 A preprint version of this article was uploaded at bioRxiv ([www.biorxiv.org](http://www.biorxiv.org))

Knop et al.

- 460 Ahima, R.S., Dushay, J., Flier, S.N., Prabakaran, D., Flier, J.S., 1997. Leptin accelerates the onset of  
461 puberty in normal female mice. *J. Clin. Invest.* 99, 391–5. <https://doi.org/10.1172/JCI119172>
- 462 Asghari, V., Sanyal, S., Buchwaldt, S., Paterson, A., Jovanovic, V., Van Tol, H.H., 1995. Modulation of  
463 intracellular cyclic AMP levels by different human dopamine D4 receptor variants. *J.*  
464 *Neurochem.* 65, 1157–65.
- 465 Bakermans-Kranenburg, M.J., van IJzendoorn, M.H., 2015. The Hidden Efficacy of Interventions:  
466 GenexEnvironment Experiments from a Differential Susceptibility Perspective. *Ssrn.*  
467 <https://doi.org/10.1146/annurev-psych-010814-015407>
- 468 Bakermans-Kranenburg, M.J., van IJzendoorn, M.H., 2011. Differential susceptibility to rearing  
469 environment depending on dopamine-related genes: New evidence and a meta-analysis. *Dev.*  
470 *Psychopathol.* 23, 39–52. <https://doi.org/10.1017/S0954579410000635>
- 471 Bakermans-Kranenburg, M.J., van IJzendoorn, M.H., 2006. Gene-environment interaction of the  
472 dopamine D4 receptor (DRD4) and observed maternal insensitivity predicting externalizing  
473 behavior in preschoolers. *Dev. Psychobiol.* 48, 406–409. <https://doi.org/10.1002/dev.20152>
- 474 Bakermans-Kranenburg, M.J., Van IJzendoorn, M.H., Mesman, J., Alink, L.R.A., Juffer, F., 2008a.  
475 Effects of an attachment-based intervention on daily cortisol moderated by dopamine receptor  
476 D4: A randomized control trial on 1- to 3-year-olds screened for externalizing behavior. *Dev.*  
477 *Psychopathol.* 20, 805–820. <https://doi.org/10.1017/S0954579408000382>
- 478 Bakermans-Kranenburg, M.J., van IJzendoorn, M.H., Pijlman, F.T.A., Mesman, J., Juffer, F., 2008b.  
479 Experimental evidence for differential susceptibility: Dopamine D4 receptor polymorphism  
480 (DRD4 VNTR) moderates intervention effects on toddlers' externalizing behavior in a  
481 randomized controlled trial. *Dev. Psychol.* 44, 293–300. [https://doi.org/10.1037/0012-](https://doi.org/10.1037/0012-1649.44.1.293)  
482 [1649.44.1.293](https://doi.org/10.1037/0012-1649.44.1.293)

Knop et al.

- 483 Belsky, J., Ruttle, P.L., Boyce, W.T., Armstrong, J.M., Essex, M.J., 2015. Early adversity, elevated stress  
484 physiology, accelerated sexual maturation, and poor health in females. *Dev. Psychol.* 51, 816–  
485 22. <https://doi.org/10.1037/dev0000017>
- 486 Belsky, J., Steinberg, L., Draper, P., 1991. Childhood Experience, Interpersonal Development, and  
487 Reproductive Strategy: An Evolutionary Theory of Socialization. *Child Dev.* 62, 647–670.  
488 <https://doi.org/10.1111/j.1467-8624.1991.tb01558.x>
- 489 Belsky, J., van IJzendoorn, M.H., 2017. Genetic differential susceptibility to the effects of parenting.  
490 *Curr. Opin. Psychol.* 15, 125–130. <https://doi.org/10.1016/J.COPSYC.2017.02.021>
- 491 Biagini, G., Pich, E.M., 2002. Corticosterone administration to rat pups, but not maternal separation,  
492 affects sexual maturation and glucocorticoid receptor immunoreactivity in the testis.  
493 *Pharmacol. Biochem. Behav.* 73, 95–103. [https://doi.org/10.1016/S0091-3057\(02\)00754-2](https://doi.org/10.1016/S0091-3057(02)00754-2)
- 494 Bonapersona, V., Kentrop, J., Van Lissa, C.J., van der Veen, R., Joëls, M., Sarabdjitsingh, R.A., 2019.  
495 The behavioral phenotype of early life adversity: a 3-level meta-analysis of rodent studies.  
496 *Neurosci. Biobehav. Rev.* <https://doi.org/10.1016/J.NEUBIOREV.2019.04.021>
- 497 Bonaventura, J., Quiroz, C., Cai, N.-S., Rubinstein, M., Tanda, G., Ferré, S., 2017. Key role of the  
498 dopamine D4 receptor in the modulation of corticostriatal glutamatergic neurotransmission.  
499 *Sci. Adv.* 3, e1601631. <https://doi.org/10.1126/sciadv.1601631>
- 500 Branchi, I., Cirulli, F., 2014. Early experiences: Building up the tools to face the challenges of adult life.  
501 *Dev. Psychobiol.* 56, 1661–1674. <https://doi.org/10.1002/dev.21235>
- 502 Branchi, I., D’Andrea, I., Fiore, M., Di Fausto, V., Aloe, L., Alleva, E., 2006. Early Social Enrichment  
503 Shapes Social Behavior and Nerve Growth Factor and Brain-Derived Neurotrophic Factor Levels  
504 in the Adult Mouse Brain. *Biol. Psychiatry* 60, 690–696.  
505 <https://doi.org/10.1016/j.biopsych.2006.01.005>

Knop et al.

- 506 Branchi, I., Santarelli, S., D'Andrea, I., Alleva, E., 2013. Not all stressors are equal: Early social  
507 enrichment favors resilience to social but not physical stress in male mice. *Horm. Behav.* 63,  
508 503–509. <https://doi.org/10.1016/j.yhbeh.2013.01.003>
- 509 Buchmann, A.F., Zohsel, K., Blomeyer, D., Hohm, E., Hohmann, S., Jennen-Steinmetz, C., Treutlein, J.,  
510 Becker, K., Banaschewski, T., Schmidt, M.H., Esser, G., Brandeis, D., Poustka, L., Zimmermann,  
511 U.S., Laucht, M., 2014. Interaction between prenatal stress and dopamine D4 receptor  
512 genotype in predicting aggression and cortisol levels in young adults. *Psychopharmacology*  
513 (Berl). 231, 3089–3097. <https://doi.org/10.1007/s00213-014-3484-7>
- 514 Button, K.S., Ioannidis, J.P.A., Mokrysz, C., Nosek, B.A., Flint, J., Robinson, E.S.J., Munafò, M.R., 2013.  
515 Power failure: why small sample size undermines the reliability of neuroscience. *Nat. Rev.*  
516 *Neurosci.* 14, 365–376. <https://doi.org/10.1038/nrn3475>
- 517 Caldji, C., Tannenbaum, B., Sharma, S., Francis, D., Plotsky, P.M., Meaney, M.J., 1998. Maternal care  
518 during infancy regulates the development of neural systems mediating the expression of  
519 fearfulness in the rat. *Proc. Natl. Acad. Sci. U. S. A.* 95, 5335.  
520 <https://doi.org/10.1073/PNAS.95.9.5335>
- 521 Caligioni, C., 2010. NIH Public Access. *Curr Protoc Neurosci* 1–11.  
522 <https://doi.org/10.1002/0471142301.nsa04is48>.Assessing
- 523 Champagne, F.A., 2008. Epigenetic mechanisms and the transgenerational effects of maternal care.  
524 *Front. Neuroendocrinol.* 29, 386–397. <https://doi.org/10.1016/J.YFRNE.2008.03.003>
- 525 Cowan, C.S.M., Richardson, R., 2018. Early-life stress leads to sex-dependent changes in pubertal  
526 timing in rats that are reversed by a probiotic formulation. *Dev. Psychobiol.*  
527 <https://doi.org/10.1002/dev.21765>
- 528 Curley, J.P., Champagne, F.A., Bateson, P., Keverne, E.B., 2008. Transgenerational effects of impaired

Knop et al.

- 529 maternal care on behaviour of offspring and grandoffspring. *Anim. Behav.* 75, 1551–1561.  
530 <https://doi.org/10.1016/J.ANBEHAV.2007.10.008>
- 531 Curley, J.P., Davidson, S., Bateson, P., Champagne, F.A., 2009. Social enrichment during postnatal  
532 development induces transgenerational effects on emotional and reproductive behavior in  
533 mice. *Front. Behav. Neurosci.* 3, 25. <https://doi.org/10.3389/neuro.08.025.2009>
- 534 Davis, E.P., Stout, S.A., Molet, J., Vegetabile, B., Glynn, L.M., Sandman, C.A., Heins, K., Stern, H.,  
535 Baram, T.Z., 2017. Exposure to unpredictable maternal sensory signals influences cognitive  
536 development across species. *Proc. Natl. Acad. Sci.* 201703444.  
537 <https://doi.org/10.1073/pnas.1703444114>
- 538 Dulac, C., O'Connell, L.A., Wu, Z., 2014. Neural control of maternal and paternal behaviors. *Science*  
539 345, 765–70. <https://doi.org/10.1126/science.1253291>
- 540 Ellis, B.J., Boyce, W.T., Belsky, J., Bakermans-Kranenburg, M.J., van Ijzendoorn, M.H., 2011.  
541 Differential susceptibility to the environment: An evolutionary–neurodevelopmental theory.  
542 *Dev. Psychopathol.* 23, 7–28. <https://doi.org/10.1017/S0954579410000611>
- 543 González, S., Rangel-Barajas, C., Peper, M., Lorenzo, R., Moreno, E., Ciruela, F., Borycz, J., Ortiz, J.,  
544 Lluís, C., Franco, R., McCormick, P.J., Volkow, N.D., Rubinstein, M., Floran, B., Ferré, S., 2012.  
545 Dopamine D4 receptor, but not the ADHD-associated D4.7 variant, forms functional heteromers  
546 with the dopamine D2S receptor in the brain. *Mol. Psychiatry* 17, 650–662.  
547 <https://doi.org/10.1038/mp.2011.93>
- 548 Grassi-Oliveira, R., Honeycutt, J.A., Holland, F.H., Ganguly, P., Brenhouse, H.C., 2016. Cognitive  
549 impairment effects of early life stress in adolescents can be predicted with early biomarkers:  
550 Impacts of sex, experience, and cytokines. *Psychoneuroendocrinology* 71, 19–30.  
551 <https://doi.org/10.1016/J.PSYNEUEN.2016.04.016>



Knop et al.

- 552 Gunnar, M.R., Hostinar, C.E., Sanchez, M.M., Tottenham, N., Sullivan, R.M., 2015. Parental buffering  
553 of fear and stress neurobiology: Reviewing parallels across rodent, monkey, and human models.  
554 Soc. Neurosci. 10, 474–478. <https://doi.org/10.1080/17470919.2015.1070198>
- 555 Hartman, S., Belsky, J., 2018. Prenatal stress and enhanced developmental plasticity. J. Neural  
556 Transm. 1–21. <https://doi.org/10.1007/s00702-018-1926-9>
- 557 Hartman, S., Freeman, S.M., Bales, K.L., Belsky, J., 2018. Prenatal Stress as a Risk—and an  
558 Opportunity—Factor. Psychol. Sci. 29, 572–580. <https://doi.org/10.1177/0956797617739983>
- 559 Hayes, A.F., Preacher, K.J., 2014. Statistical mediation analysis with a multicategorical independent  
560 variable. Br. J. Math. Stat. Psychol. 67, 451–470. <https://doi.org/10.1111/bmsp.12028>
- 561 Hensch, T.K., 2005. Critical period plasticity in local cortical circuits. Nat. Rev. Neurosci. 6, 877–888.  
562 <https://doi.org/10.1038/nrn1787>
- 563 Jahn-Eimermacher, A., Lasarzik, I., Raber, J., 2011. Statistical analysis of latency outcomes in  
564 behavioral experiments. Behav. Brain Res. 221, 271–5.  
565 <https://doi.org/10.1016/j.bbr.2011.03.007>
- 566 Knop, J., Joëls, M., van der Veen, R., 2017. The added value of rodent models in studying parental  
567 influence on offspring development: opportunities, limitations and future perspectives. Curr.  
568 Opin. Psychol. 15, 174–181. <https://doi.org/10.1016/j.copsyc.2017.02.030>
- 569 Knop, J., van IJendoorn, M.H., Bakermans-Kranenburg, M.J., Joëls, M., van der Veen, R., 2019. The  
570 effects of different rearing conditions on sexual maturation and maternal care in heterozygous  
571 mineralocorticoid receptor knockout mice. Horm. Behav. 112, 54–64.  
572 <https://doi.org/10.1016/j.YHBEH.2019.04.001>
- 573 Korenbrot, C.C., Huhtaniemi, I.T., Weiner, R.I., 1977. Preputial separation as an external sign of  
574 pubertal development in the male rat. Biol. Reprod. 17, 298–303.

Knop et al.

- 575 <https://doi.org/10.1095/biolreprod17.2.298>
- 576 Krugers, H.J., Joëls, M., 2014. Long-lasting Consequences of Early Life Stress on Brain Structure,  
577 Emotion and Cognition. Springer, Berlin, Heidelberg, pp. 81–92.  
578 [https://doi.org/10.1007/7854\\_2014\\_289](https://doi.org/10.1007/7854_2014_289)
- 579 Lee, J.M., Appugliese, D., Kaciroti, N., Corwyn, R.F., Bradley, R.H., Lumeng, J.C., 2007. Weight Status  
580 in Young Girls and the Onset of Puberty. *Pediatrics* 119, e624–e630.  
581 <https://doi.org/10.1542/peds.2006-2188>
- 582 Leerkes, E.M., Su, J., Calkins, S., Henrich, V.C., Smolen, A., 2017. Variation in mothers' arginine  
583 vasopressin receptor 1a and dopamine receptor D4 genes predicts maternal sensitivity via  
584 social cognition. *Genes, Brain Behav.* 16, 233–240. <https://doi.org/10.1111/gbb.12326>
- 585 Liu, D., Diorio, J., Tannenbaum, B., Caldji, C., Francis, D., Freedman, A., Sharma, S., Pearson, D.,  
586 Plotsky, P.M., Meaney, M.J., 1997. Maternal care, hippocampal glucocorticoid receptors, and  
587 hypothalamic-pituitary-adrenal responses to stress. *Science* 277, 1659–62.
- 588 Meaney, M.J., 2001. Maternal Care, Gene Expression, and the Transmission of Individual Differences  
589 in Stress Reactivity Across Generations. *Annu. Rev. Neurosci.* 24, 1161–1192.  
590 <https://doi.org/10.1146/annurev.neuro.24.1.1161>
- 591 Molet, J., Heins, K., Zhuo, X., Mei, Y.T., Regev, L., Baram, T.Z., Stern, H., 2016. Fragmentation and high  
592 entropy of neonatal experience predict adolescent emotional outcome. *Transl. Psychiatry* 6,  
593 e702–e702. <https://doi.org/10.1038/tp.2015.200>
- 594 Nugent, N.R., Tyrka, A.R., Carpenter, L.L., Price, L.H., 2011. Gene-environment interactions: early life  
595 stress and risk for depressive and anxiety disorders. *Psychopharmacology (Berl)*. 214, 175–96.  
596 <https://doi.org/10.1007/s00213-010-2151-x>
- 597 Peña, C.J., Kronman, H.G., Walker, D.M., Cates, H.M., Bagot, R.C., Purushothaman, I., Issler, O., Loh,

Knop et al.

- 598 Y.-H.E., Leong, T., Kiraly, D.D., Goodman, E., Neve, R.L., Shen, L., Nestler, E.J., 2017. Early life  
599 stress confers lifelong stress susceptibility in mice via ventral tegmental area OTX2. *Science* 356,  
600 1185–1188. <https://doi.org/10.1126/science.aan4491>
- 601 Peña, C.J., Nestler, E.J., Bagot, R.C., 2019. Environmental Programming of Susceptibility and  
602 Resilience to Stress in Adulthood in Male Mice. *Front. Behav. Neurosci.* 13, 40.  
603 <https://doi.org/10.3389/fnbeh.2019.00040>
- 604 Rice, C.J., Sandman, C.A., Lenjavi, M.R., Baram, T.Z., 2008. A novel mouse model for acute and long-  
605 lasting consequences of early life stress. *Endocrinology* 149, 4892–4900.  
606 <https://doi.org/10.1210/en.2008-0633>
- 607 Rice, D., Barone, S., Jr, 2000. Critical periods of vulnerability for the developing nervous system:  
608 evidence from humans and animal models. *Environ. Health Perspect.* 108 Suppl 3, 511–33.  
609 <https://doi.org/10.1289/ehp.00108s3511>
- 610 Roth, T.L., Lubin, F.D., Funk, A.J., Sweatt, J.D., 2009. Lasting Epigenetic Influence of Early-Life  
611 Adversity on the BDNF Gene. *Biol. Psychiatry* 65, 760–769.  
612 <https://doi.org/10.1016/J.BIOPSYCH.2008.11.028>
- 613 Rubinstein, M., Phillips, T.J., Bunzow, J.R., Falzone, T.L., Dziewczapolski, G., Zhang, G., Fang, Y.,  
614 Larson, J.L., McDougall, J.A., Chester, J.A., Saez, C., Pugsley, T.A., Gershanik, O., Low, M.J.,  
615 Grandy, D.K., 1997. Mice lacking dopamine D4 receptors are supersensitive to ethanol, cocaine,  
616 and methamphetamine. *Cell* 90, 991–1001.
- 617 Schoots, O., Van Tol, H.H.M., 2003. The human dopamine D4 receptor repeat sequences modulate  
618 expression. *Pharmacogenomics J.* 3, 343–348. <https://doi.org/10.1038/sj.tpj.6500208>
- 619 Shin, S., Pribiag, H., Lilascharoen, V., Knowland, D., Wang, X.-Y., Lim, B.K., 2018. Drd3 Signaling in the  
620 Lateral Septum Mediates Early Life Stress-Induced Social Dysfunction. *Neuron* 97, 195-208.e6.

Knop et al.

- 621 <https://doi.org/10.1016/J.NEURON.2017.11.040>
- 622 Tabachnick, B.G., Fidell, L.S., 2007. Using multivariate statistics. Pearson/Allyn & Bacon.
- 623 Tomova, A., Robeva, R., Kumanov, P., 2015. Influence of the body weight on the onset and  
624 progression of puberty in boys. *J. Pediatr. Endocrinol. Metab.* 28, 859–865.  
625 <https://doi.org/10.1515/jpem-2014-0363>
- 626 Turecki, G., Meaney, M.J., 2016. Effects of the Social Environment and Stress on Glucocorticoid  
627 Receptor Gene Methylation: A Systematic Review. *Biol. Psychiatry* 79, 87–96.  
628 <https://doi.org/10.1016/J.BIOPSYCH.2014.11.022>
- 629 van IJzendoorn, M.H., Bakermans-Kranenburg, M.J., Mesman, J., 2008. Dopamine system genes  
630 associated with parenting in the context of daily hassles. *Genes, Brain Behav.* 7, 403–410.  
631 <https://doi.org/10.1111/j.1601-183X.2007.00362.x>
- 632 Walker, C.-D., Bath, K.G., Joels, M., Korosi, A., Larauche, M., Lucassen, P.J., Morris, M.J., Raineke, C.,  
633 Roth, T.L., Sullivan, R.M., Taché, Y., Baram, T.Z., 2017. Chronic early life stress induced by  
634 limited bedding and nesting (LBN) material in rodents: critical considerations of methodology,  
635 outcomes and translational potential. *Stress* 20, 421–448.  
636 <https://doi.org/10.1080/10253890.2017.1343296>
- 637 Yam, K.Y., Naninck, E.F.G., Abbink, M.R., la Fleur, S.E., Schipper, L., van den Beukel, J.C., Grefhorst, A.,  
638 Oosting, A., van der Beek, E.M., Lucassen, P.J., Korosi, A., 2017. Exposure to chronic early-life  
639 stress lastingly alters the adipose tissue, the leptin system and changes the vulnerability to  
640 western-style diet later in life in mice. *Psychoneuroendocrinology* 77, 186–195.  
641 <https://doi.org/10.1016/j.psyneuen.2016.12.012>
- 642 Zandstra, A.R.E., Ormel, J., Hoekstra, P.J., Hartman, C.A., 2018. Chronic Stressors and Adolescents'  
643 Externalizing Problems: Genetic Moderation by Dopamine Receptor D4. The TRAILS Study. *J.*

Knop et al.

644 Abnorm. Child Psychol. 46, 73–82. <https://doi.org/10.1007/s10802-017-0279-4>

645

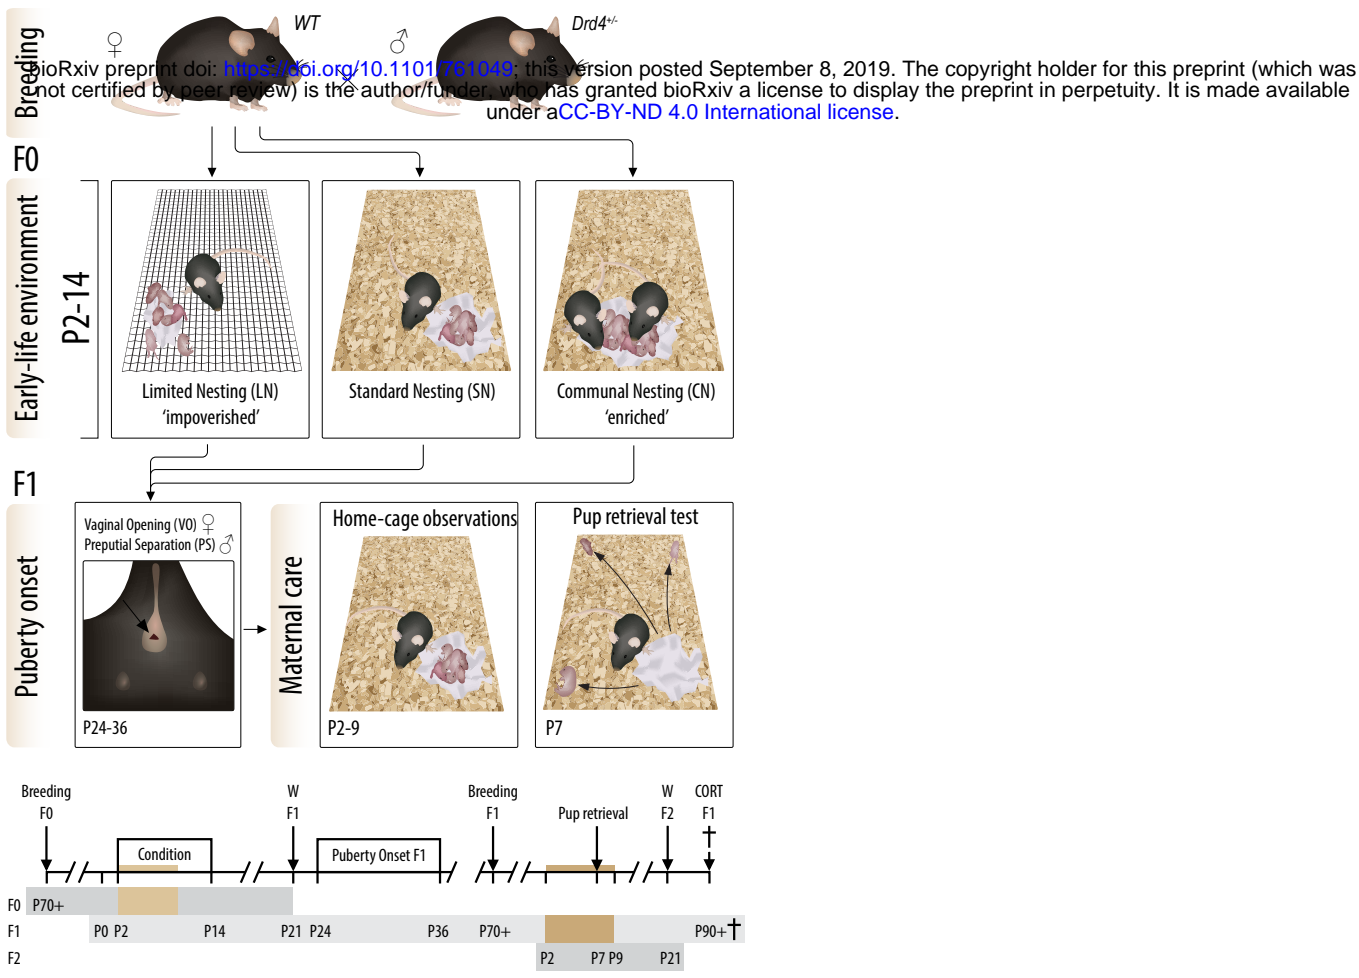

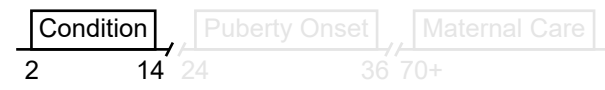

bioRxiv preprint doi: <https://doi.org/10.1101/761049>; this version posted September 8, 2019. The copyright holder for this preprint (which was not certified by peer review) is the author/funder, who has granted bioRxiv a license to display the preprint in perpetuity. It is made available under aCC-BY-ND 4.0 International license.

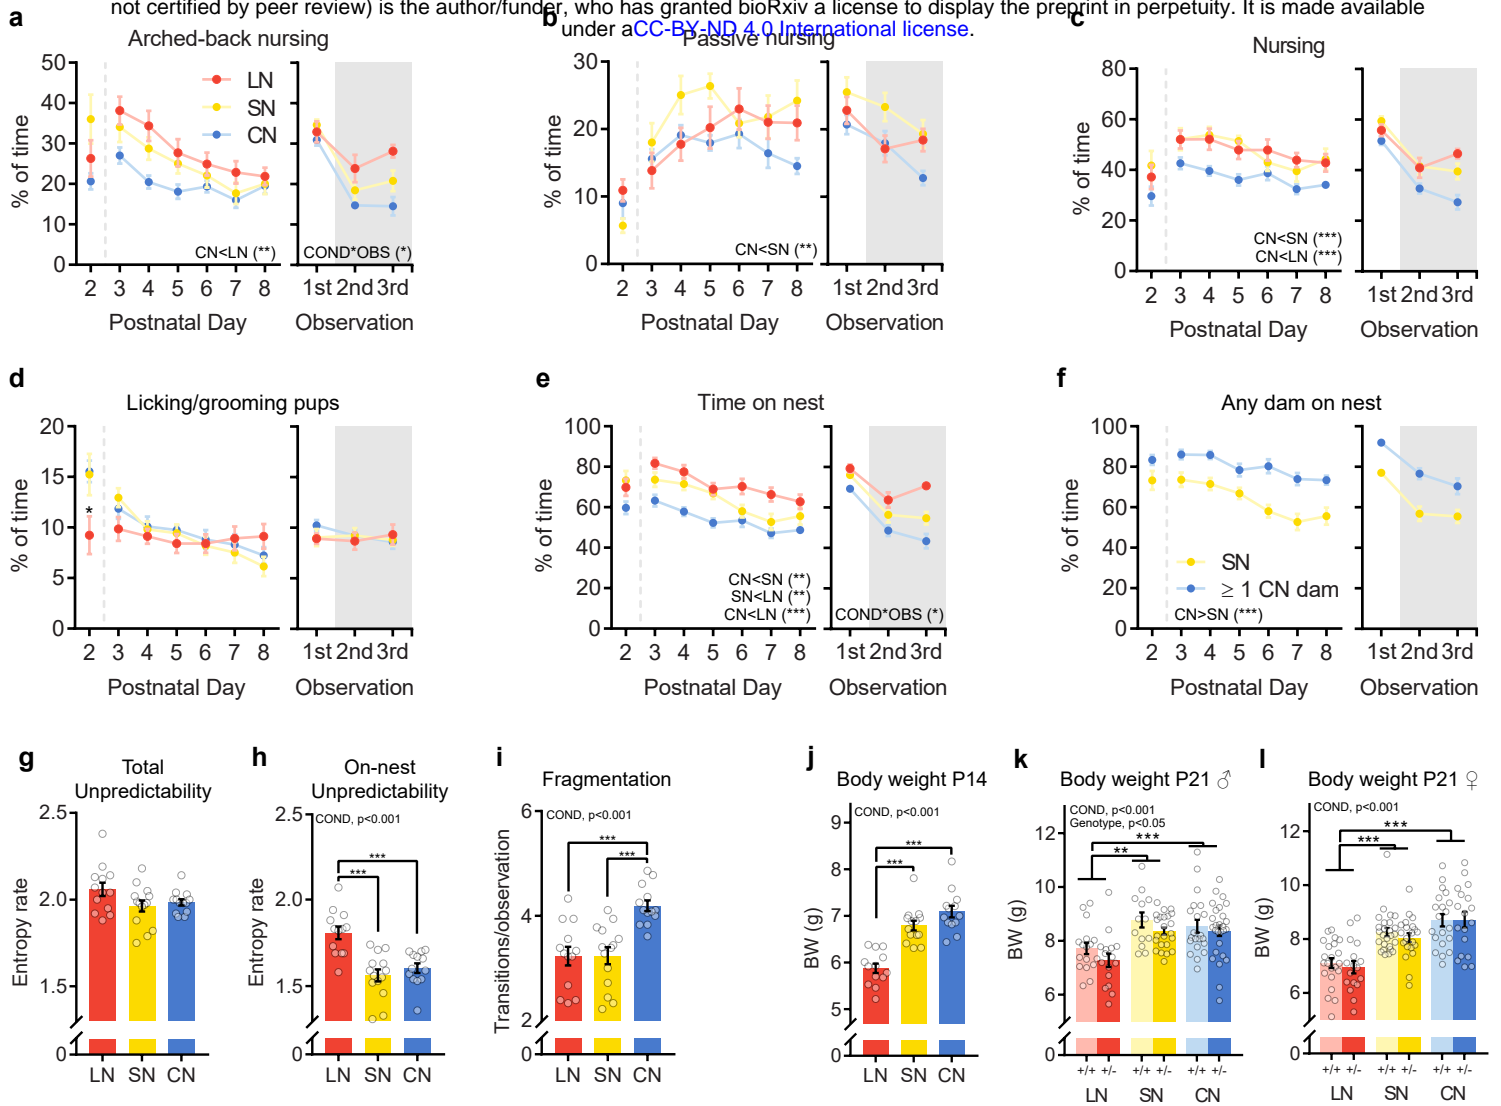

**Figure 2** Effect of different housing conditions on F0 maternal care and F1 body weight.

(a) Arched-back nursing, (b) passive nursing, (c) total nursing, (d) licking/grooming and (e,f) time on nest for limited nesting (red, n = 13), standard nesting (yellow, n = 14) and communal nesting (blue, n = 13) dams, depicted over postnatal days (left) and time of the day (right). The shaded area indicates the dark phase of the LD cycle. Data in f represents the time on nest by at least one dam from the litters perspective. (g) Unpredictability of all scored maternal behaviors and (h) unpredictability of maternal care when all off-nest behaviors were combined into one measure. (i) Fragmentation (on/off nest transitions) of maternal behavior. Each dot represents one dam and the average of two dams in the CN condition. (j) Offspring body weight averaged per litter at postnatal day 14. (k) Offspring body weight per individual at weaning for males and (l) females. +/+ : control, +/- : heterozygous *Drd4*. Group size: ♂: LN +/+ : n = 17, LN +/- : n = 16, SN +/+ : n = 13, SN +/- : n = 23, CN +/+ : n = 22, CN +/- : n = 27; ♀: LN +/+ : n = 22, LN +/- : n = 17, SN +/+ : n = 26, SN +/- : n = 22, CN +/+ : n = 20, CN +/- : n = 18. Asterisks indicate interactions or post-hoc comparisons. \**p* < 0.05, \*\**p* < 0.01, \*\*\**p* < 0.001.

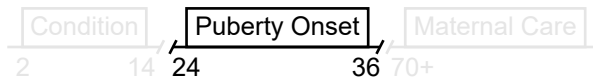

bioRxiv preprint doi: <https://doi.org/10.1101/761049>; this version posted September 8, 2019. The copyright holder for this preprint (which was not certified by peer review) is the author/funder, who has granted bioRxiv a license to display the preprint in perpetuity. It is made available under aCC-BY-ND 4.0 International license.

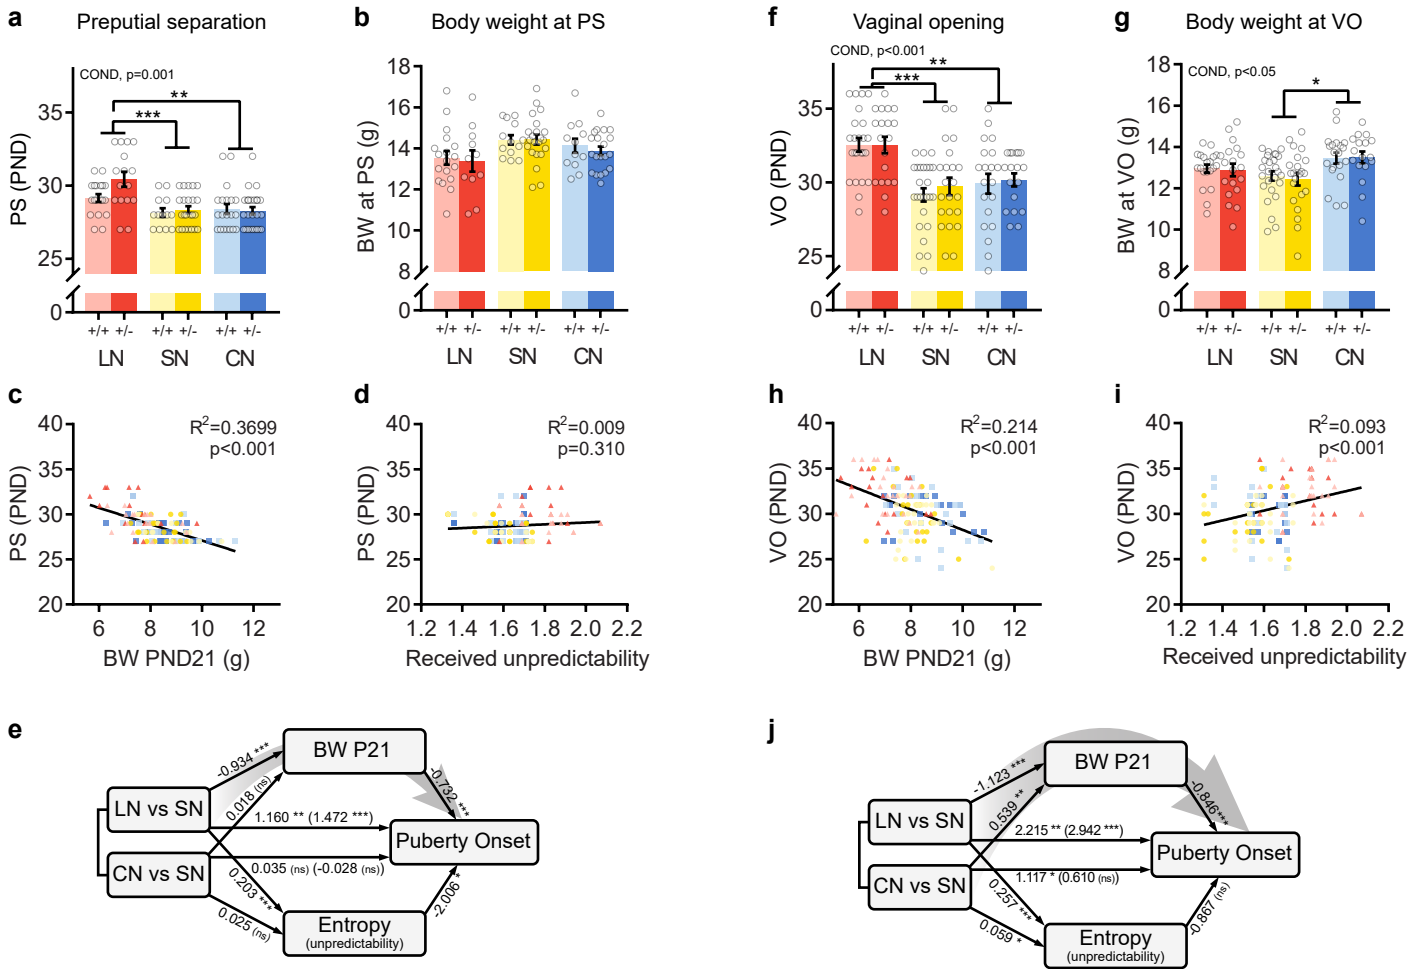

**Figure 3** Effects of different rearing conditions on sexual maturation in male and female offspring.

(a,f) Puberty onset in male (preputial separation) and female (vaginal opening) mice. (b,g) Body weight at puberty onset. (c,h) Body weight at weaning negatively correlated with puberty onset in both males and females, whereas (d,i) received on-nest unpredictability rates during rearing positively correlated with puberty onset only in females. (e,j) Graphical representation of mediation models. Numbers represent estimated model coefficients, direct effects are depicted in parenthesis. Grey arrows indicate a significant mediation pathway. +/+ : control, +/-: heterozygous *Drd4*. Asterisks indicate post hoc comparisons. \* $p < 0.05$ , \*\* $p < 0.01$ , \*\*\* $p < 0.001$ .



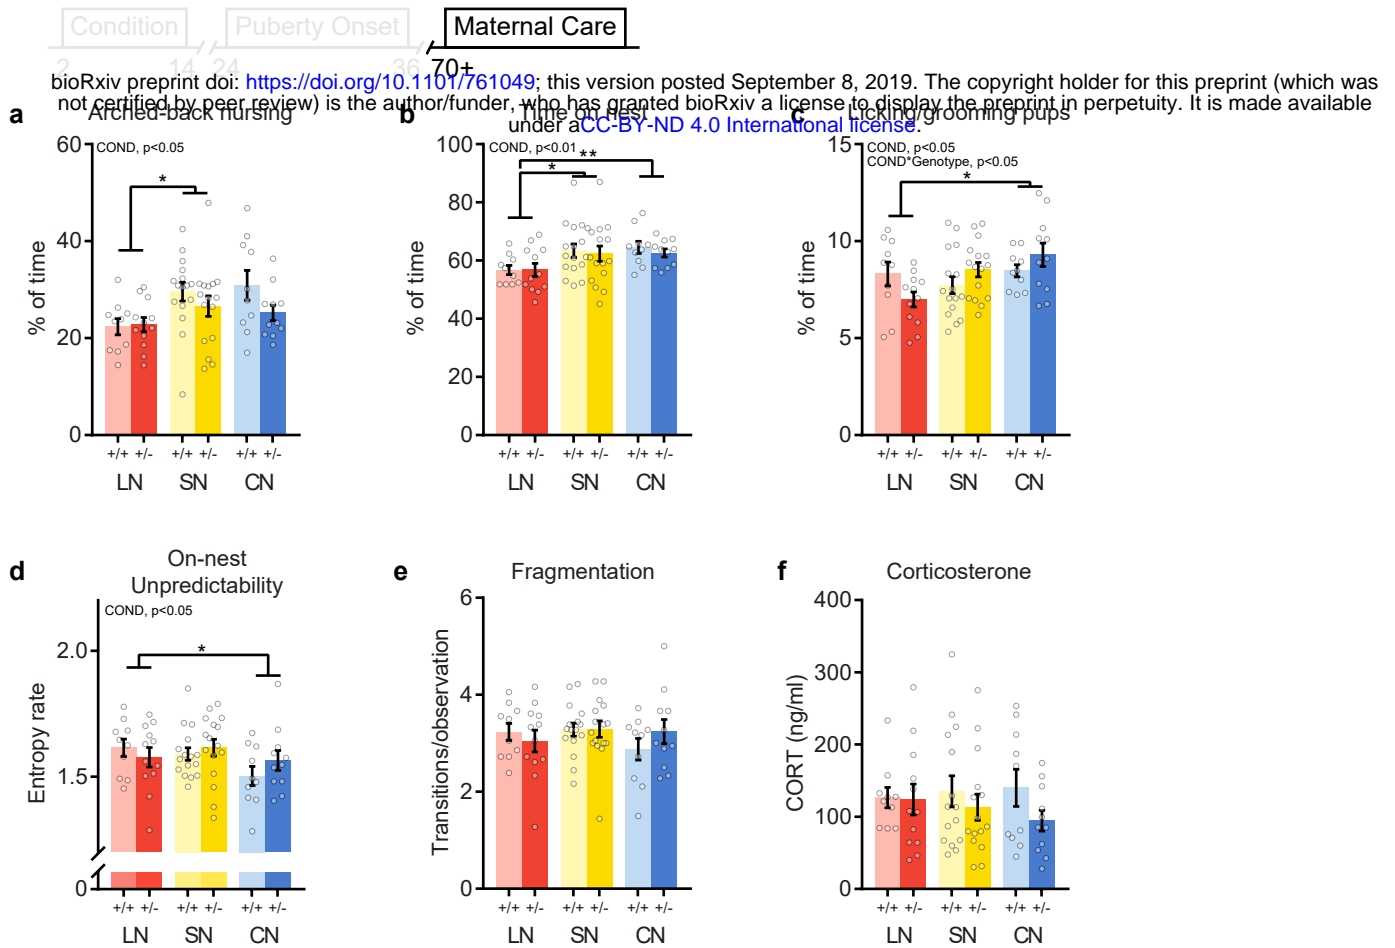

**Figure 4** Effects of different rearing conditions and *Drd4* genotype on maternal care and basal corticosterone levels in female F1 offspring.

Overall (P2-9) levels of (a) Arched-back nursing, (b) time on nest and (c) licking grooming exhibited by F1 female dams. (d) On-nest unpredictability and (e) fragmentation (on/off nest transitions) of maternal behavior. (f) Basal corticosterone levels. +/+ : control, +/- : heterozygous *Drd4*. Group size: LN +/+ : n = 10, LN +/- : n = 12, SN +/+ : n = 16, SN +/- : n = 16, CN +/+ : n = 10, CN +/- : n = 11). Asterisks indicate post hoc comparisons. \* $p < 0.05$ , \*\* $p < 0.01$ .

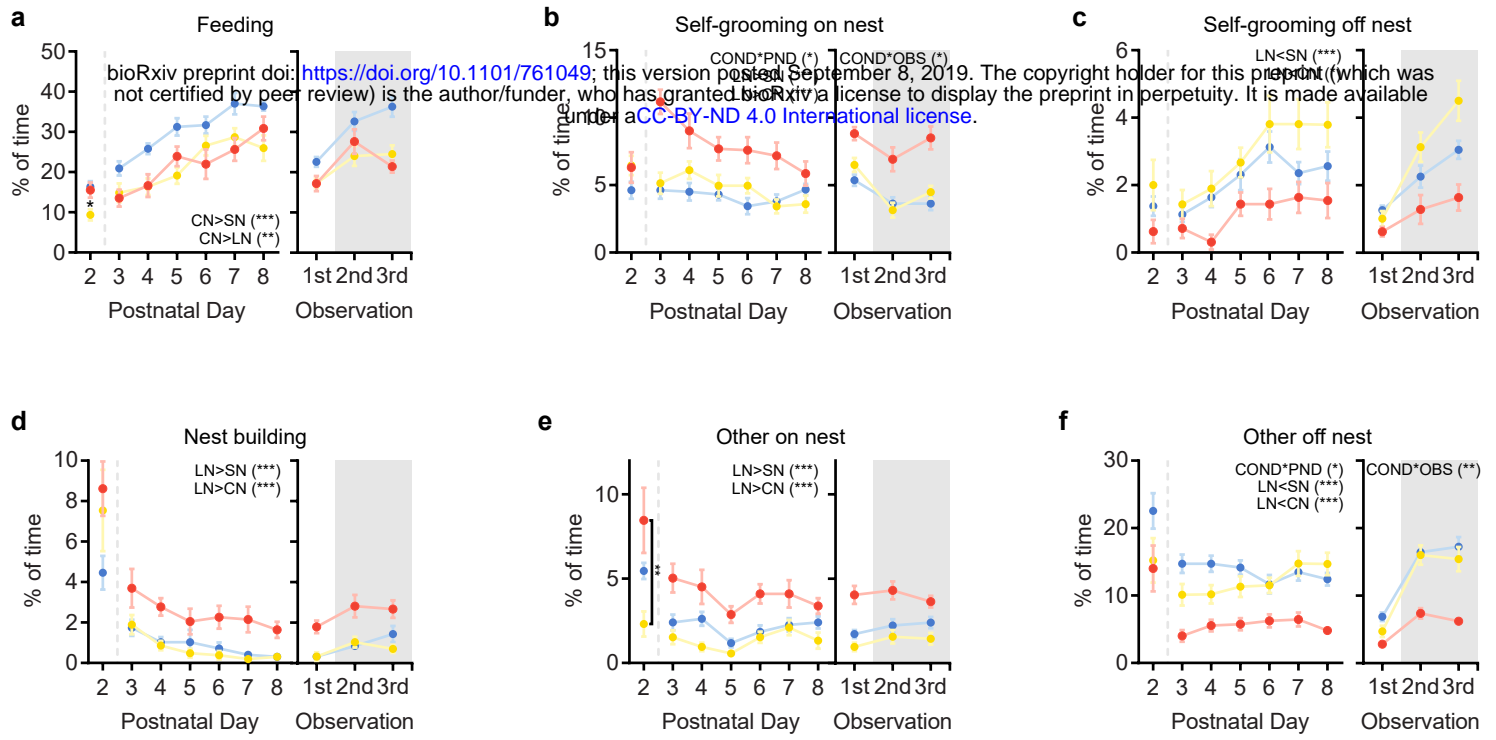

**Figure S1** Effect of different housing conditions on maternal care.

(a) Feeding, (b) self-grooming on nest, (c) self-grooming off nest, (d) nest building, (e) other on nest and (f) other off nest behavior for limited nesting (red,  $n = 13$ ), standard nesting (yellow,  $n = 14$ ) and communal nesting (blue,  $n = 13$ ) dams, depicted over postnatal days (left) and time of the day (right). The shaded area indicates the dark phase of the LD cycle. Statistics indicate main effects or interactions. \* $p < 0.05$ , \*\* $p < 0.01$ , \*\*\* $p < 0.001$ .

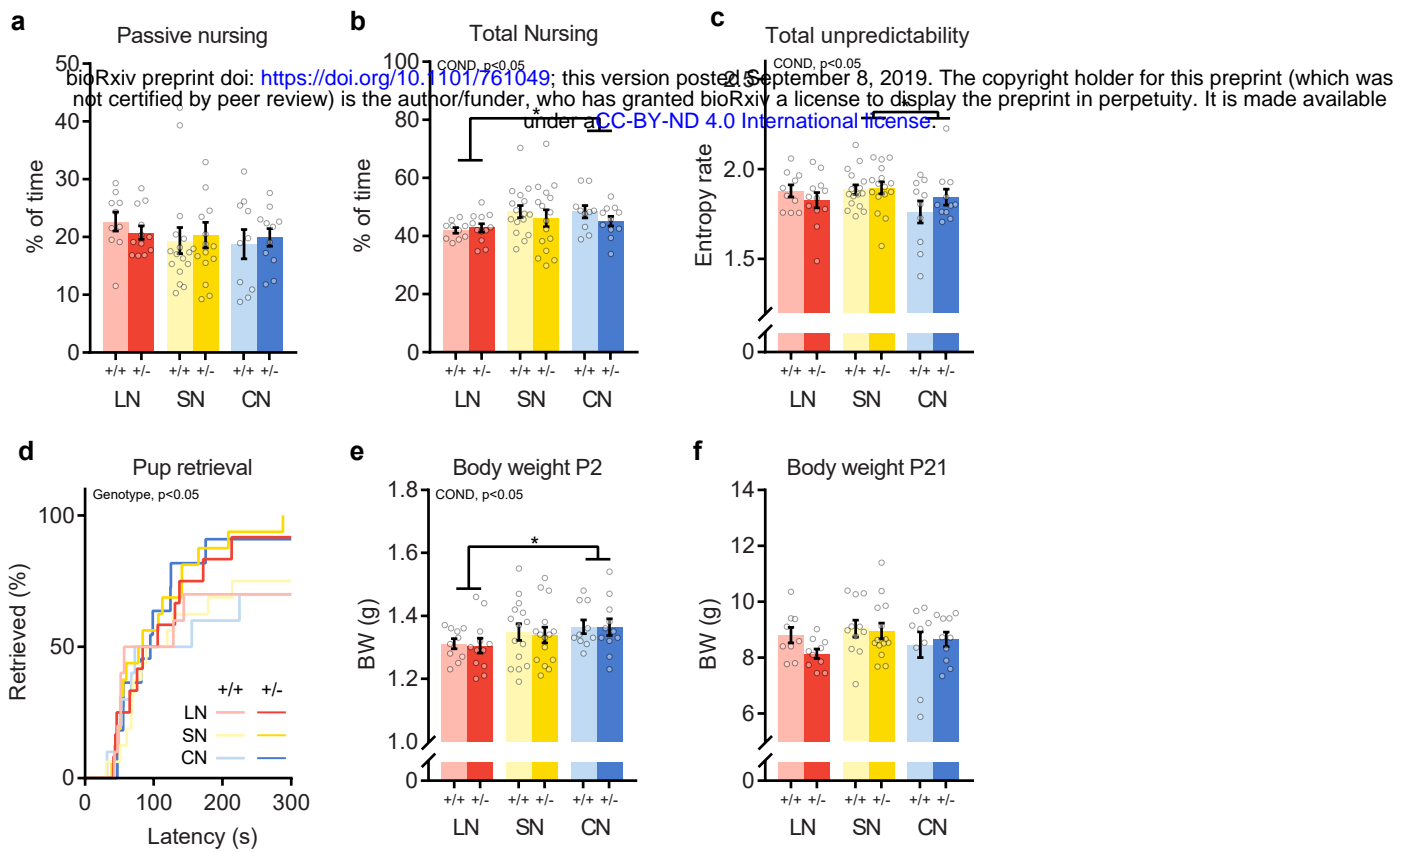

**Figure S2** Effects of different rearing conditions and *Drd4* genotype on F1 maternal care and F2 body weight.

(a) Passive nursing and (b) total nursing levels. (c) Total unpredictability rates. (d) Pup retrieval latencies and completion rates. (e) F2 offspring body weight at P2 and (f) P21. +/+ : control, +/- : heterozygous *Drd4*. Group size: LN +/+ : n = 10, LN +/- : n = 12, SN +/+ : n = 16, SN +/- : n = 16, CN +/+ : n = 10, CN +/- : n = 11). Asterisks indicate post hoc comparisons. \* $p < 0.05$ , \*\* $p < 0.01$ .
